# Supplementary material for: Significant differences in the biological activity of mononuclear Cu(ii) and Ni(ii) complexes with the polyquinolinyl ligand
Source: Royal Society of Chemistry journal article supplement (doi:10.1039/c4nj00876f), 2014-10-30
Supplement: c4nj00876f1.pdf [file c4nj00876f1.pdf]

New Journal of Chemistry

Manuscript ID NJ-ART-05-2014-000876

## Supporting Information

### **Significant differences in biological activity of mononuclear Cu(II) and Ni(II) complexes with polyquinolinyl ligand**

**Jun-Ling Li<sup>a, b, d</sup>, Lin Jiang<sup>a, b, c</sup>, Bi-Wei Wang<sup>a, b, c</sup>, Jin-Lei Tian<sup>a, b, c, d\*</sup>, Wen Gu<sup>a, b</sup>, Xin  
Liu<sup>a, b, c\*</sup> and Shi-Ping Yan<sup>a, b</sup>**

<sup>a</sup> *Department of Chemistry, Nankai University, Tianjin 300071, People's Republic of China*

<sup>b</sup> *Tianjin Key Laboratory of Metal and Molecule Based Material Chemistry, Tianjin 300071,*

*People's Republic of China*

<sup>c</sup> *Key Laboratory of Advanced Energy Materials Chemistry (MOE), Tianjin 300071, People's Republic of  
China*

<sup>d</sup> *Collaborative Innovation Center of Chemical Science and Engineering (Tianjin)*

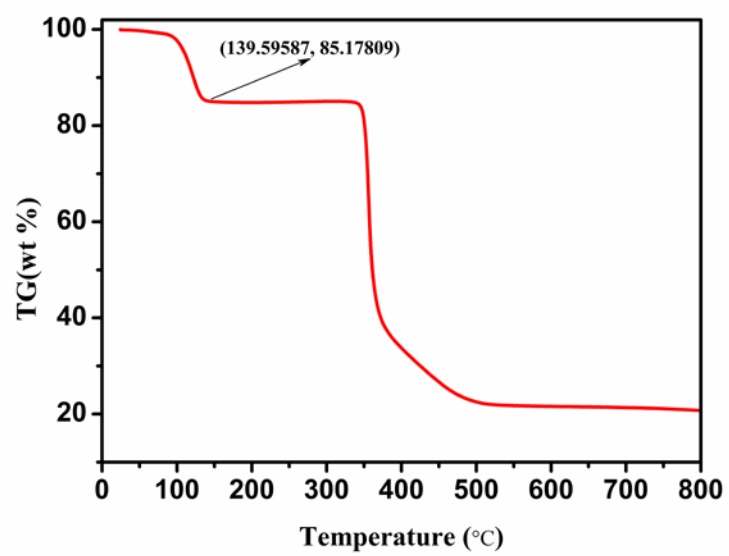

**Fig. S1** Thermogravimetric analysis for complex 2.

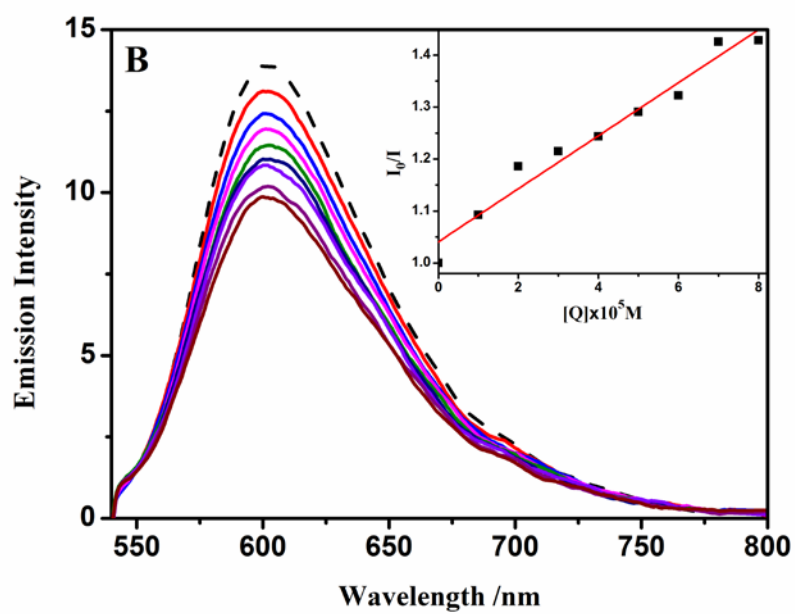

**Fig. S2** Emission spectra of EB bound to CT-DNA in the absence (dashed line) and presence (solid lines) of complex **2** (0-80  $\mu\text{M}$ ) in (5 mM Tris, 50 mM NaCl pH = 7.2). Inset: the plot of  $I_0 / I$  versus the complex concentration.

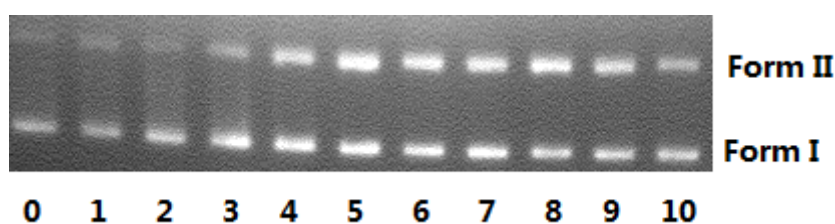

**Fig. S3** Cleavage of plasmid pBR322 DNA (0.1  $\mu\text{g}/\mu\text{L}$ ) at different concentration of complex **2** after 3h incubation at 37  $^{\circ}\text{C}$ ; Line 0: DNA control; Line 1: DNA +0.25 mM  $\text{H}_2\text{O}_2$ ; Line 2-10: DNA +0.25mM  $\text{H}_2\text{O}_2$ + complex **2** (5, 20, 35, 50, 55, 60, 65, 70, 75  $\mu\text{M}$ ).

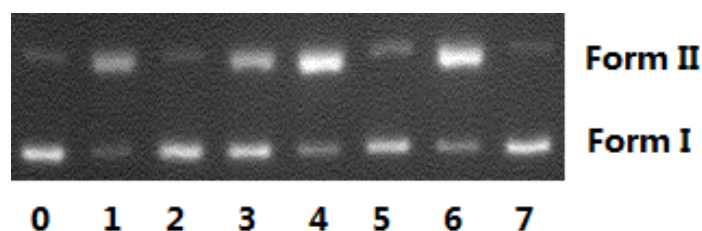

**Fig. S4** Cleavage of plasmid pBR322 DNA (0.1  $\mu\text{g}/\mu\text{L}$ ) in the presence of 50  $\mu\text{M}$  complex **1** and different inhibitors after 3h incubation at 37  $^{\circ}\text{C}$ ; Line 0: DNA control; Line 1: DNA+ complex **1**(50  $\mu\text{M}$ ); Line 2-7: DNA + complex **1**+(10 mM KI, 10 mM  $\text{NaN}_3$ , 20 u/mL SOD, Methyl Green, SYBR Green, 10 mM EDTA)

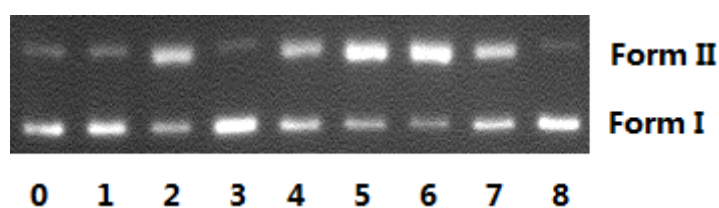

**Fig. S5** Cleavage of plasmid pBR322 DNA (0.1  $\mu\text{g}/\mu\text{L}$ ) in the presence of 50  $\mu\text{M}$  complex **2** and different inhibitors after 3h incubation at 37  $^{\circ}\text{C}$ ; Line 0: DNA control; Line 1: DNA+ 0.25 mM  $\text{H}_2\text{O}_2$ . Line 2: DNA+ 0.25 mM  $\text{H}_2\text{O}_2$  +complex **2**(50  $\mu\text{M}$ ); Line 3-8: DNA + 0.25mM  $\text{H}_2\text{O}_2$  +complex **2**+(10 mM KI, 10 mM  $\text{NaN}_3$ , 20 u/mL SOD, Methyl Green, SYBR Green, 10 mM EDTA)

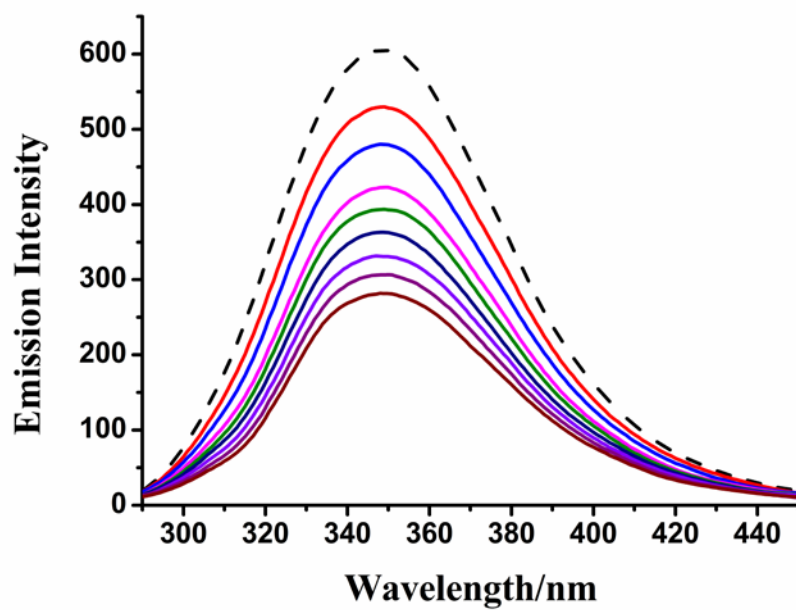

**Fig. S6** Fluorescence emission spectra of the BSA (29.4  $\mu\text{M}$ ) system in the absence (dashed line) and presence (solid lines) of complex 2 (0-40  $\mu\text{M}$ ).

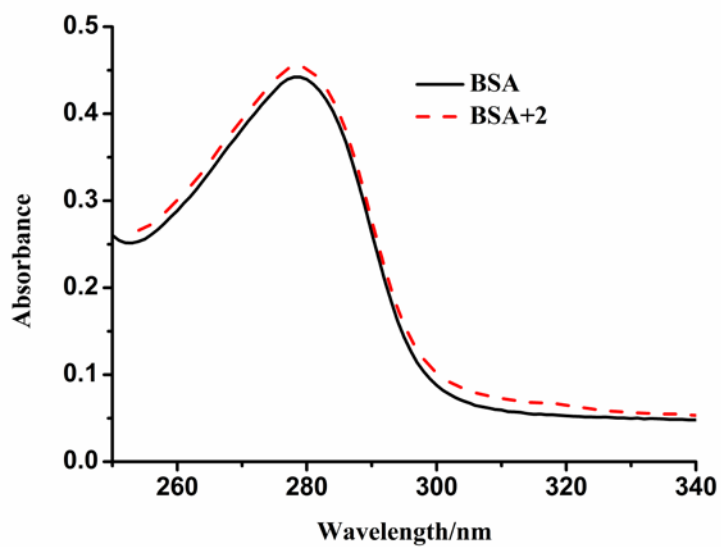

(a)

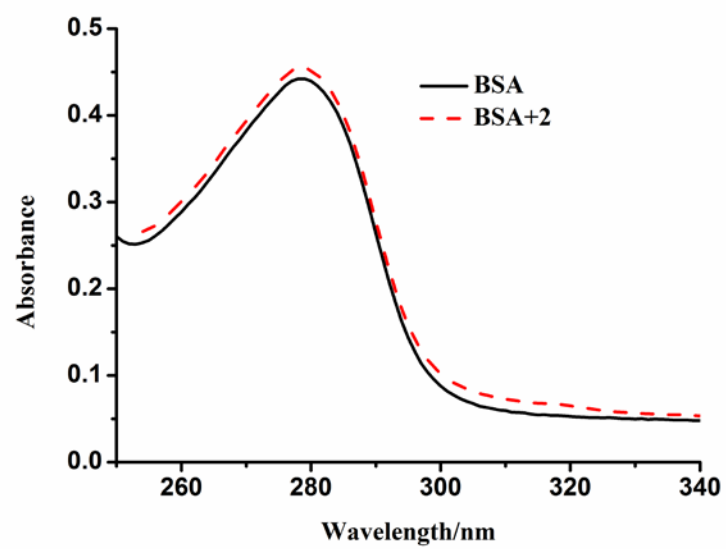

(b)

**Fig. S7(a-b)** Absorption spectra of BSA (15  $\mu\text{M}$ ) and BSA with complex 1 and 2 (1  $\mu\text{M}$ ).
